# Supplementary material for: Unique, dual-indexed sequencing adapters with UMIs effectively eliminate index cross-talk and significantly improve sensitivity of massively parallel sequencing
Source: PubMed Central journal article supplement (PMC5759201; doi:10.1186/s12864-017-4428-5), 2018-01-08
Supplement: 12864_2017_4428_MOESM4_ESM.pdf [file 12864_2017_4428_MOESM4_ESM.pdf]

|  |                                            |
|--|--------------------------------------------|
|  | Barcode used in sample library preparation |
|  | Row / column cross-talk                    |
|  | Non row / column cross-talk                |
|  | No cross-talk                              |

|          | 1        | 2        | 3        | 4   | 5   | 6    | 7   | 8   | 9    | 10   | 11  | 12  |
|----------|----------|----------|----------|-----|-----|------|-----|-----|------|------|-----|-----|
| <b>A</b> | 19314405 | 10758720 | 7505334  | 774 | 221 | 1779 | 107 | 15  | 31   | 1114 | 74  | 7   |
| <b>B</b> | 7083259  | 6992761  | 7272206  | 537 | 108 | 746  | 45  | 17  | 1562 | 1036 | 41  | 175 |
| <b>C</b> | 7496941  | 7749888  | 10852110 | 864 | 76  | 558  | 57  | 3   | 25   | 1410 | 32  | 163 |
| <b>D</b> | 7045812  | 7850625  | 4922     | 23  | 76  | 476  | 46  | 18  | 26   | 191  | 27  | 125 |
| <b>E</b> | 7204634  | 7364015  | 3177     | 87  | 394 | 544  | 198 | 134 | 454  | 440  | 687 | 205 |
| <b>F</b> | 7602197  | 6660412  | 2999     | 22  | 31  | 579  | 25  | 6   | 28   | 161  | 25  | 0   |
| <b>G</b> | 8133248  | 7805134  | 3456     | 13  | 62  | 588  | 80  | 9   | 17   | 181  | 35  | 0   |
| <b>H</b> | 6830509  | 8737064  | 3163     | 6   | 64  | 446  | 79  | 5   | 24   | 207  | 38  | 0   |
