# Supplementary material for: Unique, dual-indexed sequencing adapters with UMIs effectively eliminate index cross-talk and significantly improve sensitivity of massively parallel sequencing
Source: PubMed Central journal article supplement (PMC5759201; doi:10.1186/s12864-017-4428-5), 2018-01-08
Supplement: 12864_2017_4428_MOESM8_ESM.pdf [file 12864_2017_4428_MOESM8_ESM.pdf]

|   | 1 | 2  | 3  |
|---|---|----|----|
| A | 1 | 7  | 13 |
| B | 2 | 8  | 14 |
| C | 3 | 9  | 15 |
| D | 4 | 10 | 16 |
| E | 5 | 11 |    |
| F | 6 | 12 |    |
