# Supplementary material for: Unique, dual-indexed sequencing adapters with UMIs effectively eliminate index cross-talk and significantly improve sensitivity of massively parallel sequencing
Source: PubMed Central journal article supplement (PMC5759201; doi:10.1186/s12864-017-4428-5), 2018-01-08
Supplement: 12864_2017_4428_MOESM9_ESM.pdf [file 12864_2017_4428_MOESM9_ESM.pdf]

|  |                                            |
|--|--------------------------------------------|
|  | Barcode used in sample library preparation |
|  | Row / column cross-talk                    |
|  | Non row / column cross-talk                |
|  | No cross-talk                              |

**(a)**

|   | 1        | 2        | 3   | 4 | 5   | 6    | 7   | 8  | 9   | 10   | 11 | 12 |
|---|----------|----------|-----|---|-----|------|-----|----|-----|------|----|----|
| A | 41519    | 54198466 | 6   | 7 | 0   | 8    | 491 | 4  | 150 | 1057 | 11 | 1  |
| B | 54107457 | 49533    | 221 | 1 | 500 | 4479 | 115 | 10 | 29  | 125  | 9  | 0  |
| C | 8        | 11       | 7   | 1 | 0   | 0    | 0   | 0  | 0   | 0    | 0  | 0  |
| D | 11027    | 16       | 0   | 0 | 0   | 0    | 0   | 0  | 0   | 0    | 0  | 0  |
| E | 7        | 557      | 1   | 0 | 1   | 0    | 1   | 0  | 0   | 0    | 1  | 0  |
| F | 5        | 12       | 1   | 0 | 0   | 0    | 0   | 0  | 0   | 0    | 0  | 0  |
| G | 3        | 214      | 0   | 0 | 1   | 1    | 0   | 0  | 1   | 0    | 0  | 0  |
| H | 10       | 18       | 0   | 0 | 0   | 0    | 0   | 0  | 0   | 0    | 0  | 0  |

**(b)**

|   | 1         | 2         | 3   | 4 | 5    | 6     | 7    | 8  | 9   | 10   | 11 | 12 |
|---|-----------|-----------|-----|---|------|-------|------|----|-----|------|----|----|
| A | 548358    | 197176658 | 10  | 2 | 8    | 44    | 1867 | 1  | 554 | 4872 | 5  | 2  |
| B | 184166643 | 506396    | 852 | 0 | 1469 | 14560 | 364  | 26 | 64  | 465  | 0  | 1  |
| C | 15        | 125       | 1   | 2 | 0    | 0     | 0    | 0  | 0   | 1    | 0  | 2  |
| D | 38047     | 133       | 0   | 1 | 0    | 4     | 0    | 0  | 0   | 6    | 0  | 0  |
| E | 20        | 1960      | 3   | 0 | 3    | 2     | 3    | 0  | 0   | 0    | 9  | 0  |
| F | 10        | 12        | 0   | 0 | 0    | 0     | 0    | 0  | 1   | 0    | 0  | 0  |
| G | 6         | 746       | 1   | 0 | 0    | 0     | 0    | 0  | 1   | 0    | 0  | 0  |
| H | 16        | 21        | 2   | 0 | 0    | 0     | 1    | 0  | 0   | 0    | 0  | 0  |
