# Supplementary material for: Unique, dual-indexed sequencing adapters with UMIs effectively eliminate index cross-talk and significantly improve sensitivity of massively parallel sequencing
Source: PubMed Central journal article supplement (PMC5759201; doi:10.1186/s12864-017-4428-5), 2018-01-08

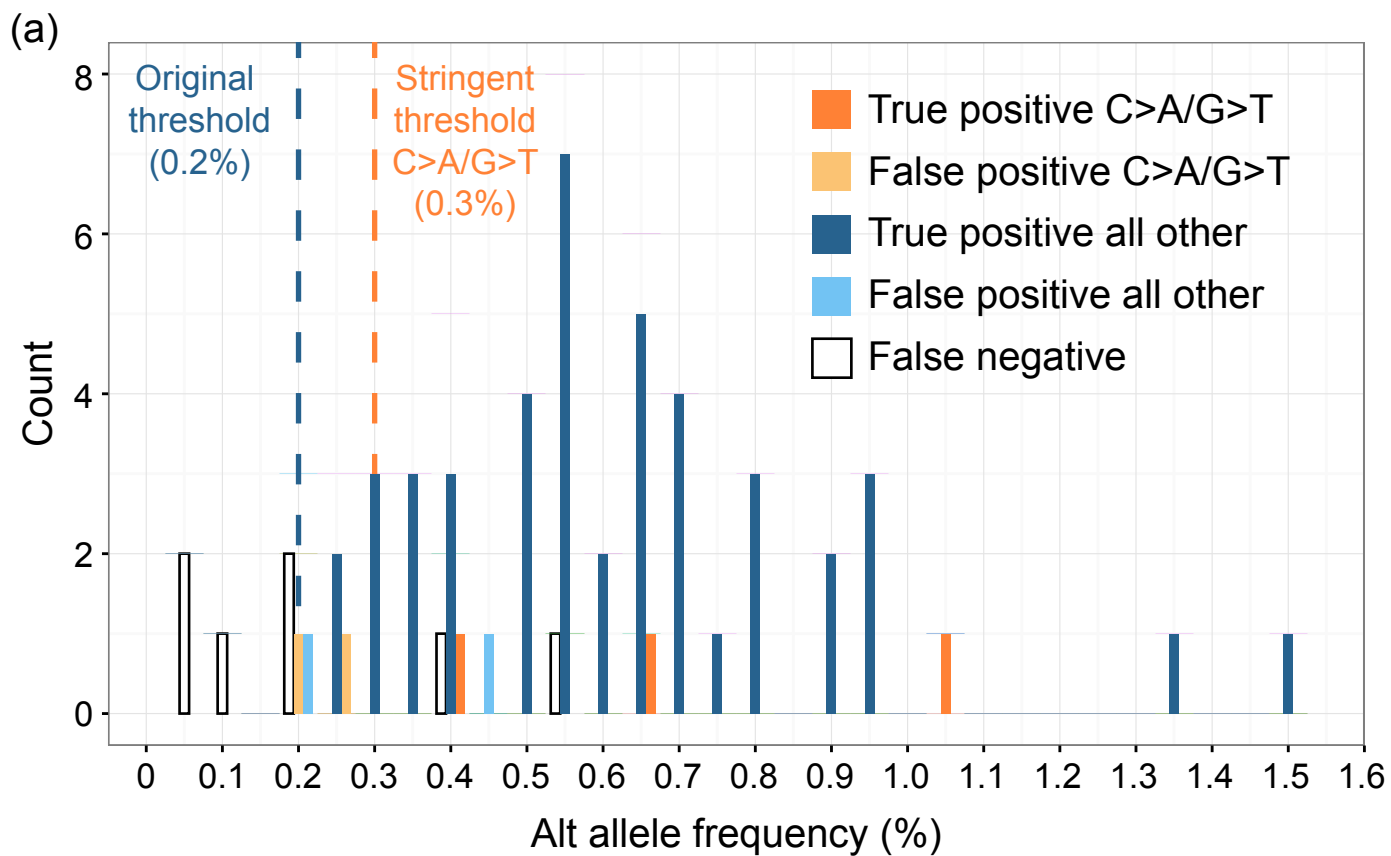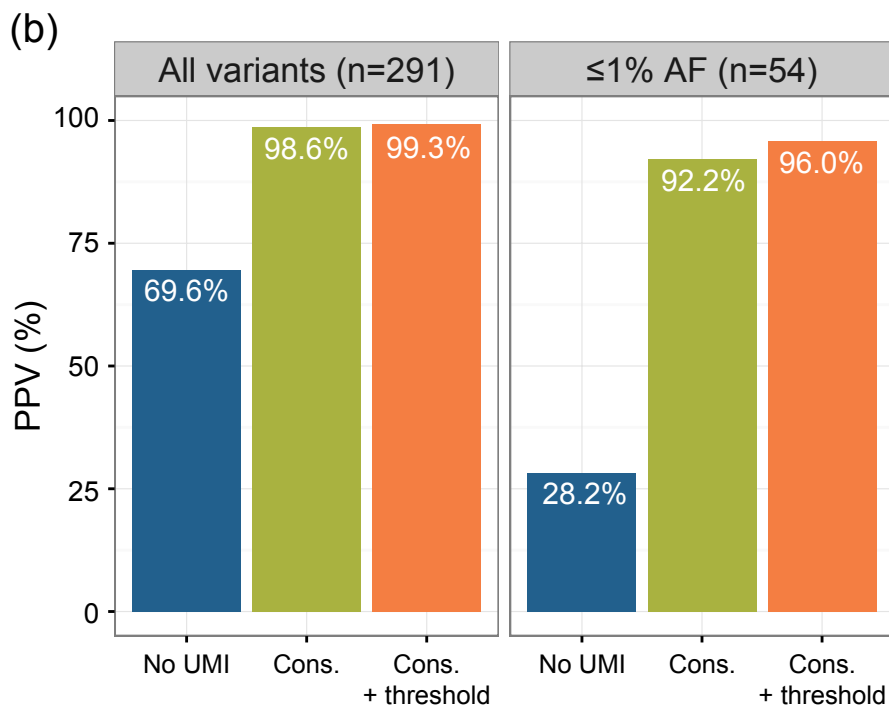

Supplement: 12864_2017_4428_MOESM10_ESM.pdf [file 12864_2017_4428_MOESM10_ESM.pdf]
